# Supplementary material for: Construction of a Z-scheme heterojunction bifunctional photocatalyst with Ag-modified AgBr embedded in β-Bi2O3 flowers
Source: Royal Society of Chemistry journal article supplement (doi:10.1039/d3cp01223a), 2023-01-01
Supplement: d3cp01223a1.pdf [file d3cp01223a1.pdf]

## Supporting information

### Construction of Z-scheme heterojunction bifunctional photocatalyst with Ag modified AgBr embedded in $\beta$ - $\text{Bi}_2\text{O}_3$ flower

Xin Guan<sup>a, b, 1</sup>, Xiao-li Wang<sup>a, b, 1</sup>, Xue-wen Zhu<sup>a</sup>, Hui Yu<sup>a, \*</sup>, Ming Yang<sup>a</sup>, Xiang-ting Dong<sup>a, \*</sup>, Ying Yang<sup>a, \*</sup> and Long Xia<sup>b, \*</sup>

<sup>a</sup> School of Chemistry & Environmental Engineering, Changchun University of Science and Technology, Changchun 130022, P. R. China

<sup>b</sup> School of Materials Science and Engineering, Harbin Institute of Technology (Weihai), Weihai 264209, P. R. China

\*Corresponding author.

yuhui@cust.edu.cn; dongxiangting888@163.com; yangying0807@126.com; xialong@hit.edu.cn.

<sup>1</sup> co-first author

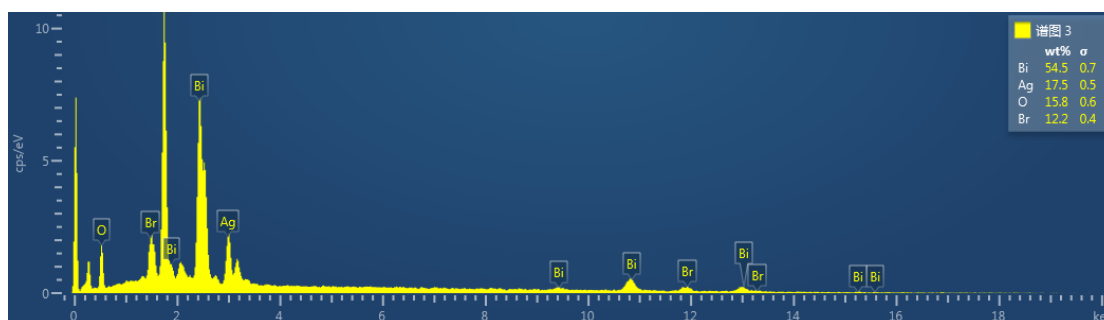

Fig. S1 EDS spectra of 3-Ag-AgBr/ $\beta$ - $\text{Bi}_2\text{O}_3$  sample

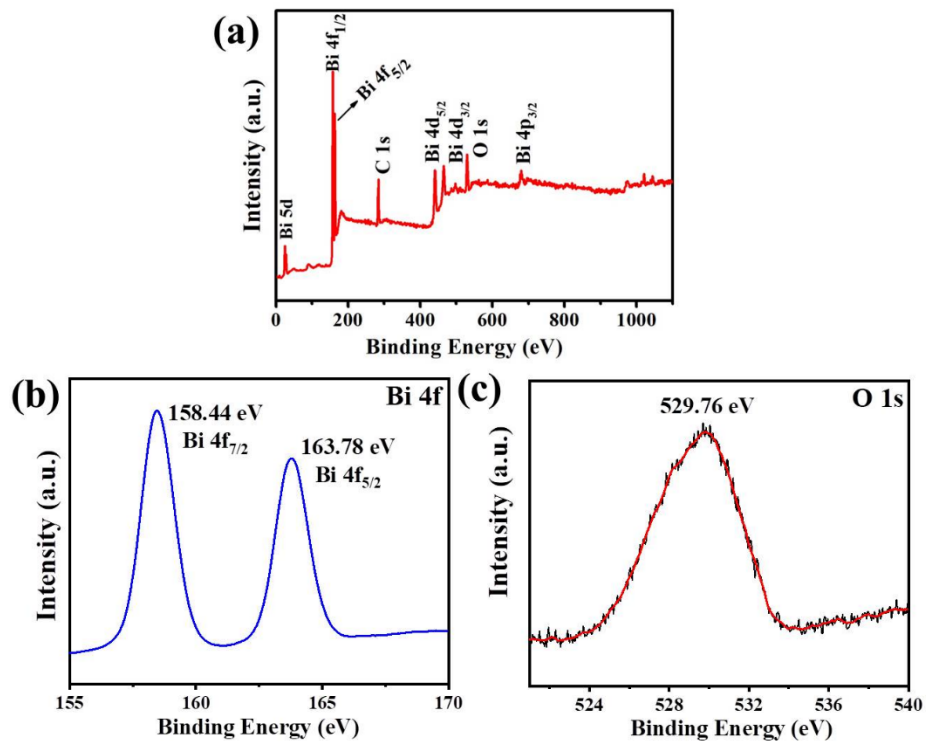

Fig. S2 XPS spectra of  $\beta$ - $\text{Bi}_2\text{O}_3$  matrix: (a) full spectrum, (b) Bi 4f, (c) O 1s.
